# Supplementary material for: Saving the locals: a conservation genomics approach to the Endangered Spanish Toothcarp, Aphanius iberus (Valenciennes, 1846)
Source: Research Square preprint supplement (doi:10.21203/rs.3.rs-7494783/v1), 2025-09-26
Supplement: Supplementary file 2 [file cd74905394af3b1c4476e0be.xlsx]

## Sheet: Hoja 1
Table S3. Primers and PCR conditions used to amplify the Cytochrome B gene.
Gene fragment	Primer name	Or	Sequence (5'-3')	Reference	PCR conditions
Cytochrome B	GluF	F	AACCACCGTTGTATTCAACTACAA	Machordom & Doadrio (2001)	95º(5’);94º(2”), 55º(5”),72º(5”) x 41;72(2’)
	ThR	R	ACCTCCGATCTTCGGATTACAAGACCG
