# Supplementary material for: Saving the locals: a conservation genomics approach to the Endangered Spanish Toothcarp, Aphanius iberus (Valenciennes, 1846)
Source: Research Square preprint supplement (doi:10.21203/rs.3.rs-7494783/v1), 2025-09-26
Supplement: Supplementary file 3 [file ea962b368fac520feee9d30c.xlsx]

## Sheet: Sheet1
Table S1. Table of specimens for which we obtianed whole genome sequencing data, their location, genetic lineage according to the PCA analysis, coverage and information on which individuals are included in each dataset. The coverage in parenthesis is to which the individuals of higher coverage were downsampled.
Specimen code	Species	Population name	Locality code	Latitude	Longitude	Genetic group (PCA results)	Coverage	Dataset
CN21623	Aphanius iberus	Clot de la Llúdriga	1	42.218	3.11311	North Catalonia	9.72187	1&2
CN21782	Aphanius iberus	Bassa del Pi	2	42.0467	3.19278	North Catalonia	8.33397	1&2
CN21784	Aphanius iberus	Bassa del Pi	2	42.0467	3.19278	North Catalonia	13,6547 (8,8755)	1&2
CN21806	Aphanius iberus	Mollet del Vallès	3	41.5454	2.1988	Levante	8.21786	1&2
CN21809	Aphanius iberus	Rubí	4	41.4971	2.03493	South Catalonia	8.48088	1&2
CN21810	Aphanius iberus	Rubí	4	41.4971	2.03493	South Catalonia	8.56026	1&2
CN21814	Aphanius iberus	Sant Cugat del Vallès	5	41.4721	2.08652	Sant Cugat	8.69575	1&2
CN21582	Aphanius iberus	ZOO Barcelona	6	41.3891	2.18817	Prat de Llobregat	7.90409	1&2
CN21815	Aphanius iberus	Prat de Llobregat	7	41.3023	2.1291	Prat de Llobregat	9.63042	1&2
CN21777	Aphanius iberus	Bassa Pineda de Can Camins	8	41.2849	2.09744	Prat de Llobregat	9.0677	1&2
CN21596	Aphanius iberus	Les Madrigueres	9	41.1843	1.54815	South Catalonia	13,8022 (8,9714)	1&2
CN21766	Aphanius iberus	Riera de Murtra	10	41.1617	1.45469	South Catalonia	6.43986	1&2
CN21756	Aphanius iberus	Bassa Nova (Gaià)	11	41.1332	1.3655	South Catalonia	7.22996	1&2
CN21655	Aphanius iberus	Tributaris - Sèquia Major	12	41.0845	1.17879	Salou	6.01659	1&2
CN21591	Aphanius iberus	Tributaris - Sèquia Major	12	41.0845	1.17879	Salou	6.65931	1&2
CN21728	Aphanius iberus	Tributaris - Sèquia Major	12	41.0845	1.17879	Salou	7.27071	1&2
CN21703	Aphanius iberus	Riera de Llastres	14	40.9925	0.930532	North Catalonia	8.03383	1&2
CN21682	Aphanius iberus	Estany Gelat	13	41.0215	0.953777	North Catalonia	7.41145	1&2
CN21758	Aphanius iberus	Estany Gelat	13	41.0215	0.953777	North Catalonia	6.99854	1&2
CN21656	Aphanius iberus	Estany Gelat	13	41.0215	0.953777	North Catalonia	9.752	1&2
CN21681	Aphanius iberus	Torrent del Pi	17	40.9001	0.822047	Salou	8.0802	1&2
CN21638	Aphanius iberus	Torrent del Pi	17	40.9001	0.822047	Salou	7.52408	1&2
CN21754	Aphanius iberus	Torrent del Pi	17	40.9001	0.822047	Salou	8.11218	1&2
CN21642	Aphanius iberus	Sant Jordi d'Alfama	15	40.9119	0.830924	Salou	7.94295	1&2
CN21598	Aphanius iberus	Sant Jordi d'Alfama	15	40.9119	0.830924	Salou	5.01486	1&2
CN21657	Aphanius iberus	Sant Jordi d'Alfama	15	40.9119	0.830924	Salou	7.68601	1&2
CN21640	Aphanius iberus	Estany Tort	16	40.8946	0.81492	Salou	7.73236	1&2
CN21688	Aphanius iberus	La Tancada	20	40.6495	0.735937	South Catalonia	7.44959	1&2
CN21700	Aphanius iberus	La Tancada	20	40.6495	0.735937	South Catalonia	9.04768	1&2
CN21730	Aphanius iberus	La Tancada	20	40.6495	0.735937	South Catalonia	9.67843	1&2
CN21637	Aphanius iberus	Buda - Maresmes	19	40.7086	0.853702	South Catalonia	7.94887	1&2
CN21732	Aphanius iberus	Buda - Maresmes	19	40.7086	0.853702	South Catalonia	7.75216	1&2
CN21706	Aphanius iberus	El Canal Vell	18	40.7363	0.798797	South Catalonia	6.74719	1&2
CN21760	Aphanius iberus	El Canal Vell	18	40.7363	0.798797	South Catalonia	5.99121	1&2
CN21632	Aphanius iberus	Punta de la Banya	21	40.5653	0.671207	South Catalonia	8.15563	1&2
CN21715	Aphanius iberus	Punta de la Banya	21	40.5653	0.671207	South Catalonia	6.81414	1&2
CN21727	Aphanius iberus	Punta de la Banya	21	40.5653	0.671207	South Catalonia	9.95012	1&2
AT29861	Aphanius iberus	Cabanes	22	40.1875	0.197787	Cabanes	8.18113	1&2
AT29087	Aphanius iberus	Albuixech	23	39.5447	-0.325989	Levante	9.551	1&2
AT29067	Aphanius iberus	Santa Pola	25	38.1969	-0.560314	South Spain	8.93994	1&2
AT29056	Aphanius iberus	Sax	24	38.5354	-0.821934	South Spain	9.83351	1&2
AT4839	Aphanius iberus	San Pedro del Pinatar	26	37.8349	-0.773567	South Spain	6.41203	1&2
AT5157	Aphanius iberus	Rambla Moreras	27	37.5647	-1.29841	South Spain	9.34696	1&2
AT 29851	Aphanius iberus	Adra	28	36.7815	-3.03519	Levante	7.53818	1&2
AT30199	Aphanius baeticus	Lebrija	44	36.9154	-5.94844		15,7133 (8,635)	1
AT6981	Anatolychthys anatoliae						10,6866 (8,5492)	1
